# Supplementary material
Source: PubMed Central journal article supplement (PMC4536126)
Supplement: NIHMS705400-supplement-2.pdf [file NIHMS705400-supplement-2.pdf]

**SUPPLEMENTAL INFORMATION FOR:**

**Crumbs3-mediated polarity directs airway epithelial cell fate through the Hippo pathway  
effector Yap**

Aleksander D. Szymaniak, John E. Mahoney, Wellington V. Cardoso, Xaralabos Varelas

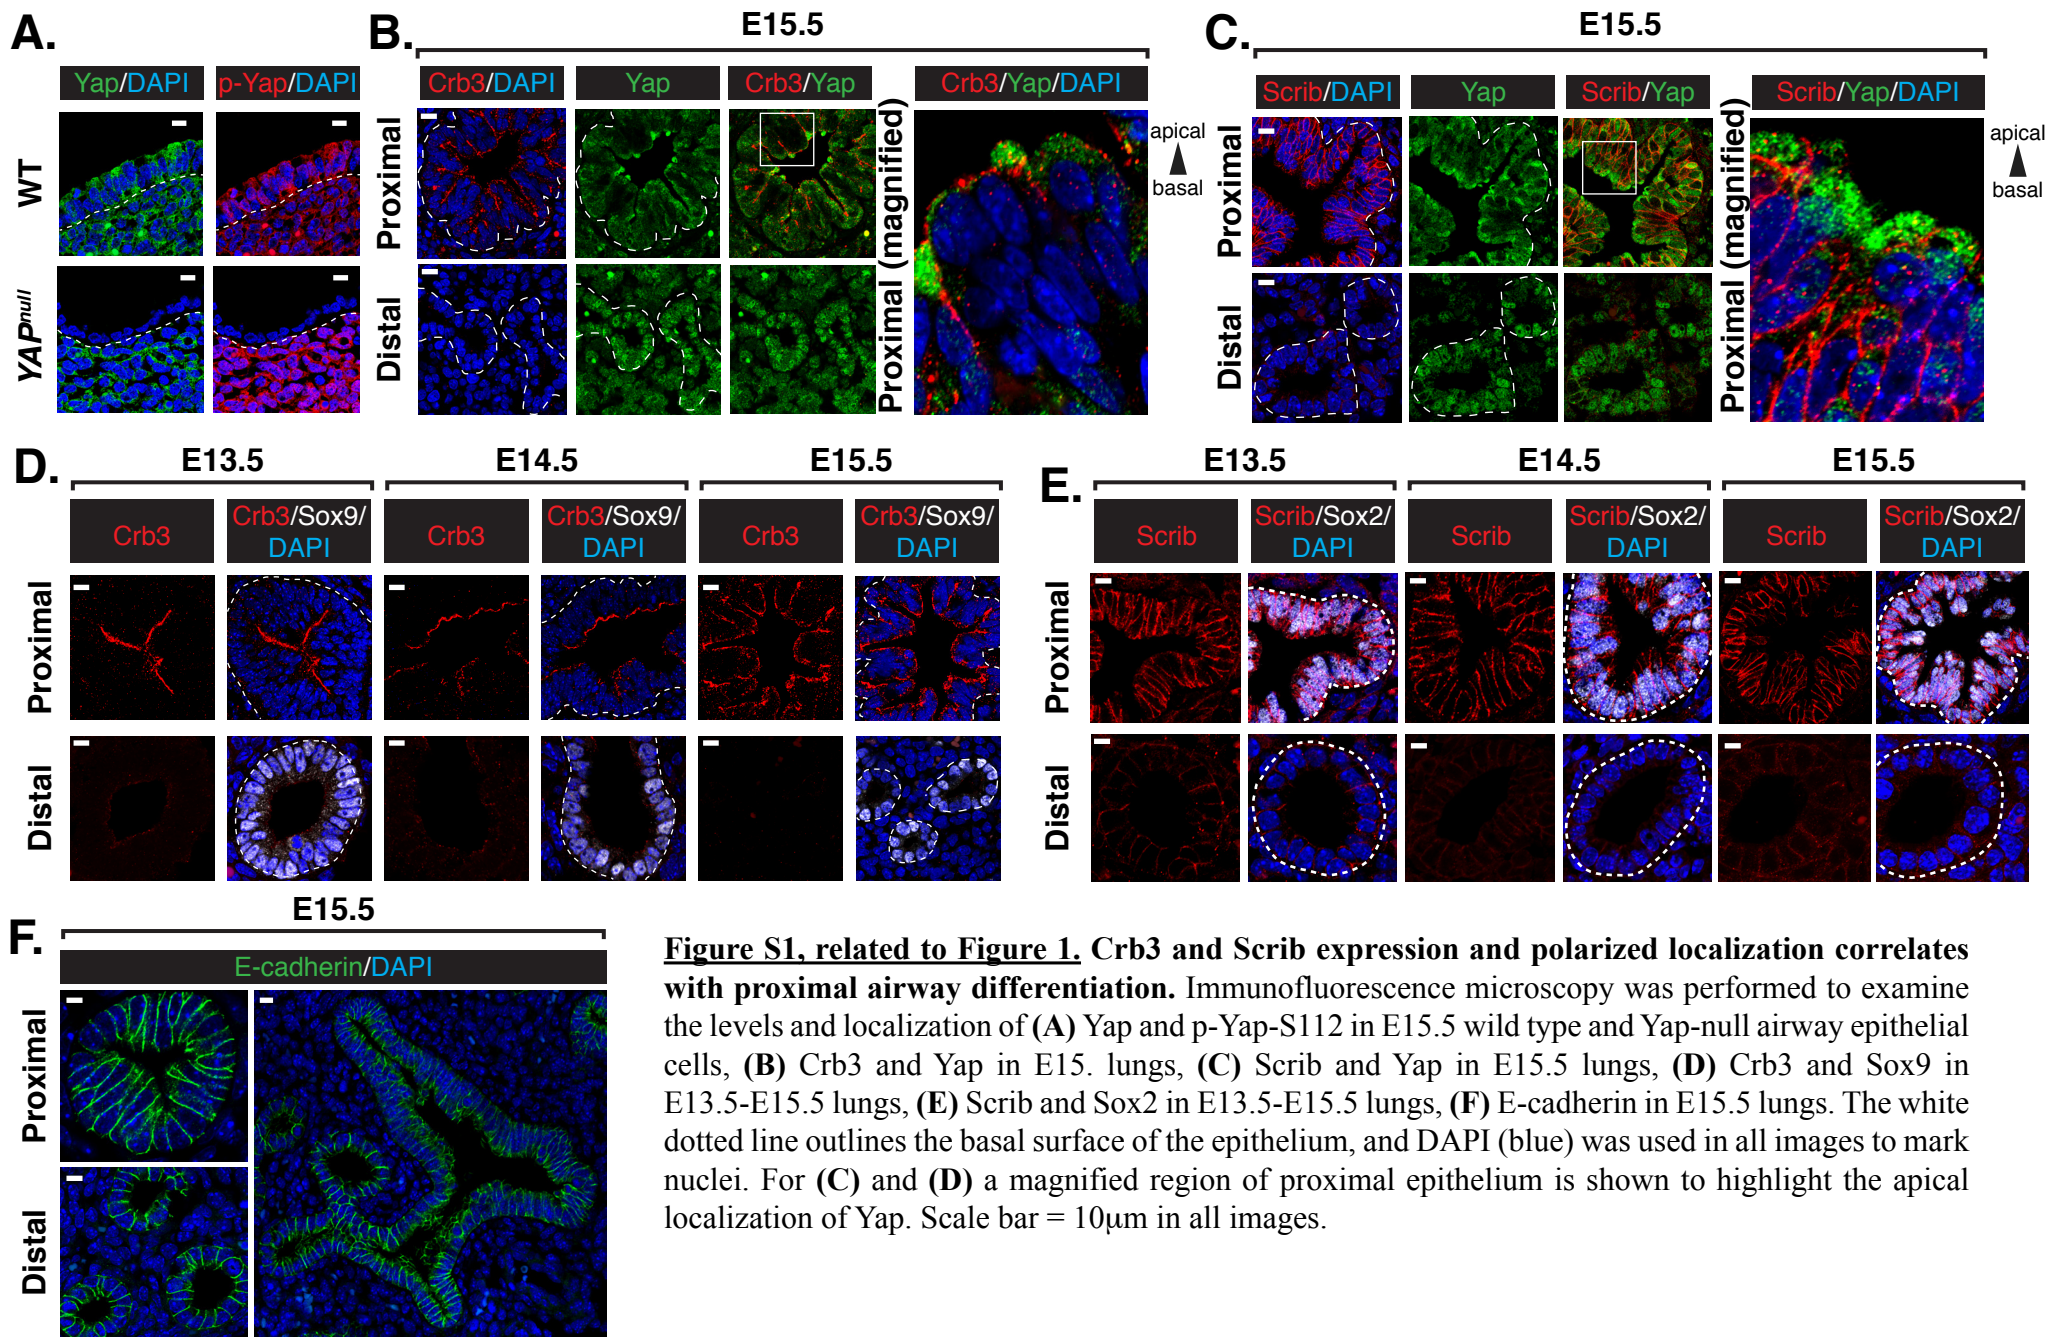

**Figure S1, related to Figure 1. Crb3 and Scrib expression and polarized localization correlates with proximal airway differentiation.** Immunofluorescence microscopy was performed to examine the levels and localization of (A) Yap and p-Yap-S112 in E15.5 wild type and Yap-null airway epithelial cells, (B) Crb3 and Yap in E15. lungs, (C) Scrib and Yap in E15.5 lungs, (D) Crb3 and Sox9 in E13.5-E15.5 lungs, (E) Scrib and Sox2 in E13.5-E15.5 lungs, (F) E-cadherin in E15.5 lungs. The white dotted line outlines the basal surface of the epithelium, and DAPI (blue) was used in all images to mark nuclei. For (C) and (D) a magnified region of proximal epithelium is shown to highlight the apical localization of Yap. Scale bar = 10µm in all images.

E18.5

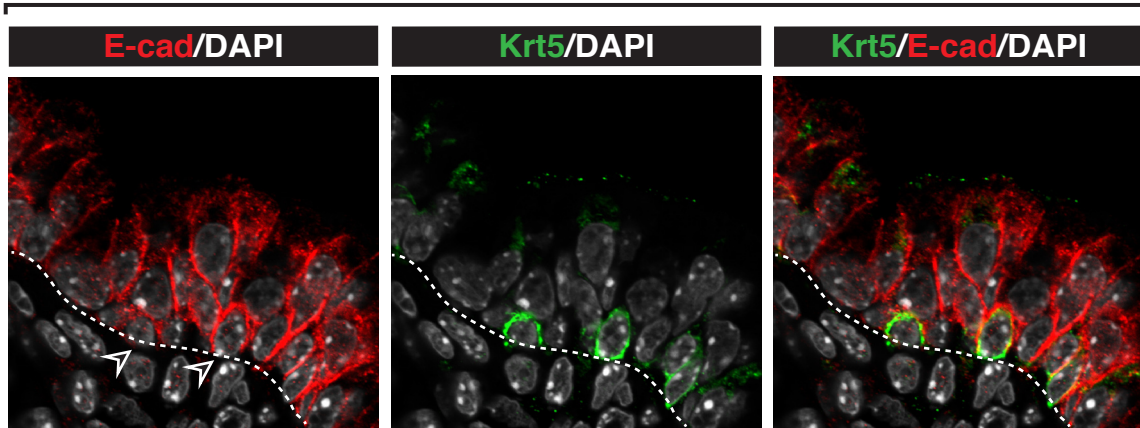

**Figure S2, related to Figure 2. Expression and localization of the adherens junction protein E-cadherin in proximal airway epithelial cells.** Similar E-cadherin (red) expression is observed between Krt5+ (green) basal progenitors and differentiated cells in developing proximal airways. Note, however, the cortical distribution of E-cadherin in the Krt5+ cells. White arrows point to the Krt5+ cells in the left image, the basal surface of the epithelium is outlined with a white dotted line, and DAPI (white) was used in all images to mark nuclei.

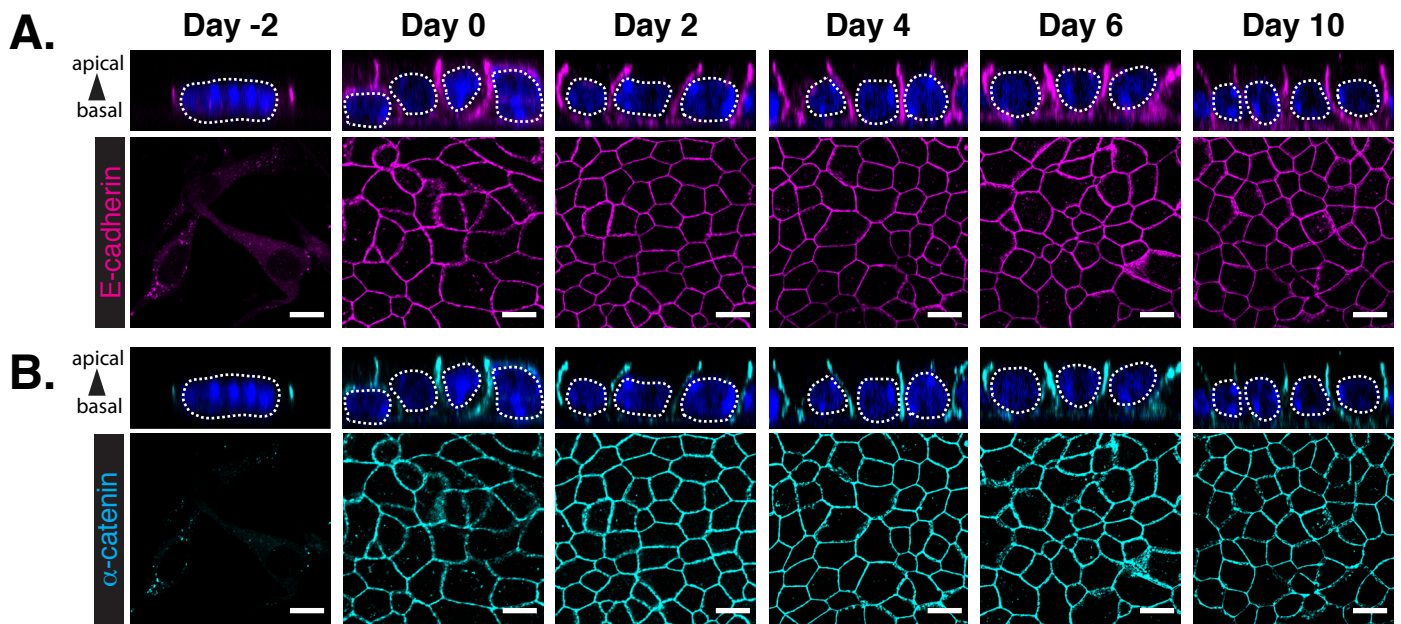

**Figure S3. Related to Figure 3. Adherens junction formation precedes airway epithelial progenitor differentiation.** Immunofluorescence confocal microscopy was performed to examine the levels and localization of (A) E-cadherin and (B)  $\alpha$ -catenin in ALI cultures. The X-Y view (bottom panels) and the Z-plane apical-basal view (top panels) for each are shown. DAPI was used to mark the nuclei (blue), which are outlined with a thin white dotted line in the Z-plane images. Scale bar = 10 $\mu$ m.

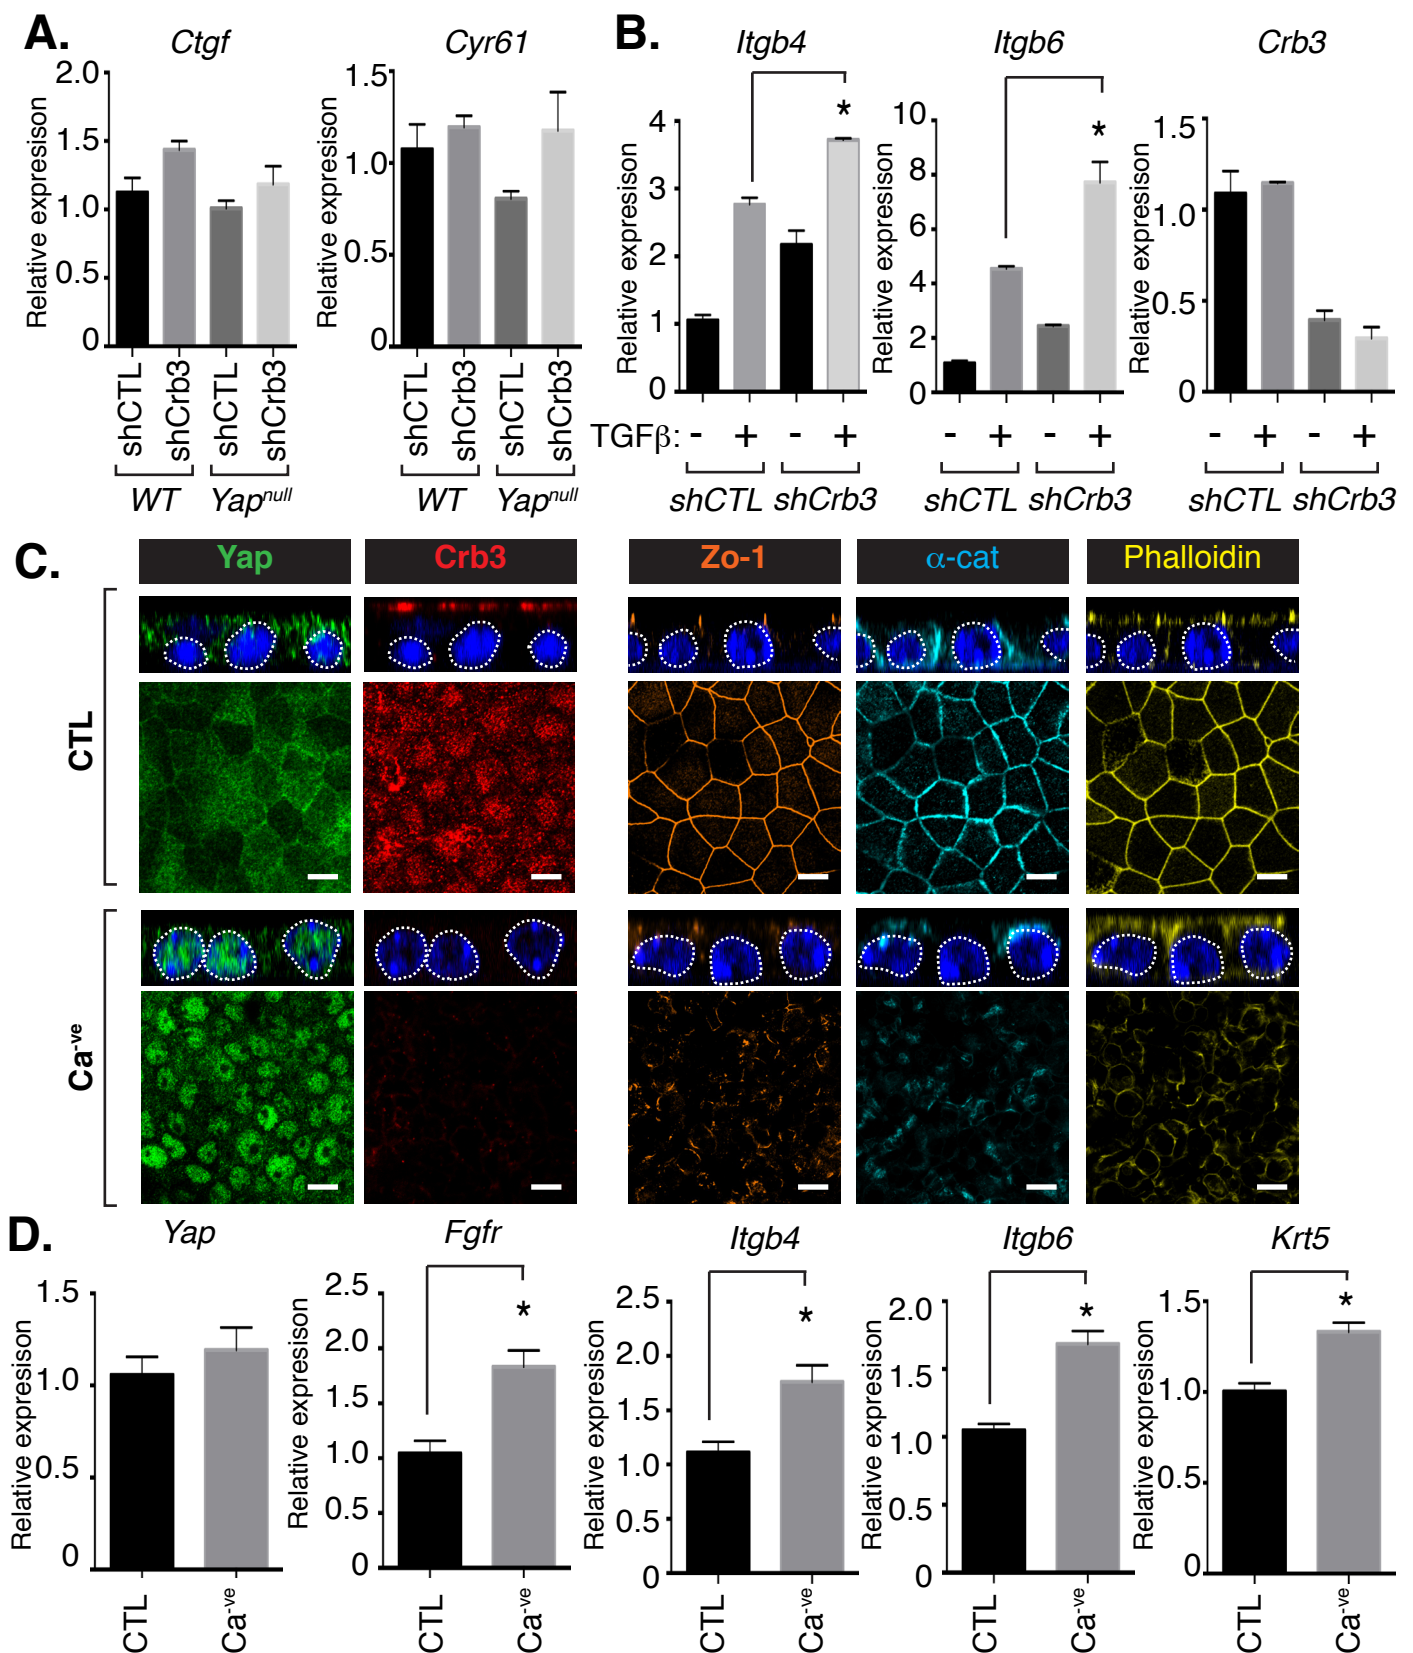

**Figure S4, Related to Figure 4.** (A) Lentiviruses were used to transduce control shRNA (shCTL) or shRNA targeting Crb3 in wild type (WT) or Yap-null airway progenitor cells, and following 6 days of ALI culture the expression of *Ctgf* and *Cyr61* was determined from these cells (same samples as in Figure 4C). (B) Airway progenitors expressing shCTL or shCrb3 were treated with or without 500pMol TGFβ for 2 hours, and the expression of the indicated Yap-p63-regulated target genes was determined (n=3, average +SEM, \* p<0.01). (C) Cadherin interactions were disrupted in differentiated airway progenitors (10 day ALI cultures) by depleting calcium from the media (*Ca*<sup>ve</sup>), and the levels and localization of the indicated proteins were determined by confocal immunofluorescence microscopy. DAPI was used to mark the nuclei (blue), which are outlined with a white dotted line in the Z-plane images. Scale bar = 10μm. (D) Cadherin interactions were disrupted in differentiated airway progenitors (10 day ALI cultures) by depleting calcium from the media (*Ca*<sup>ve</sup>) and the expression of Yap-p63-regulated target genes was determined (n=3, average +SEM, \* p<0.01).

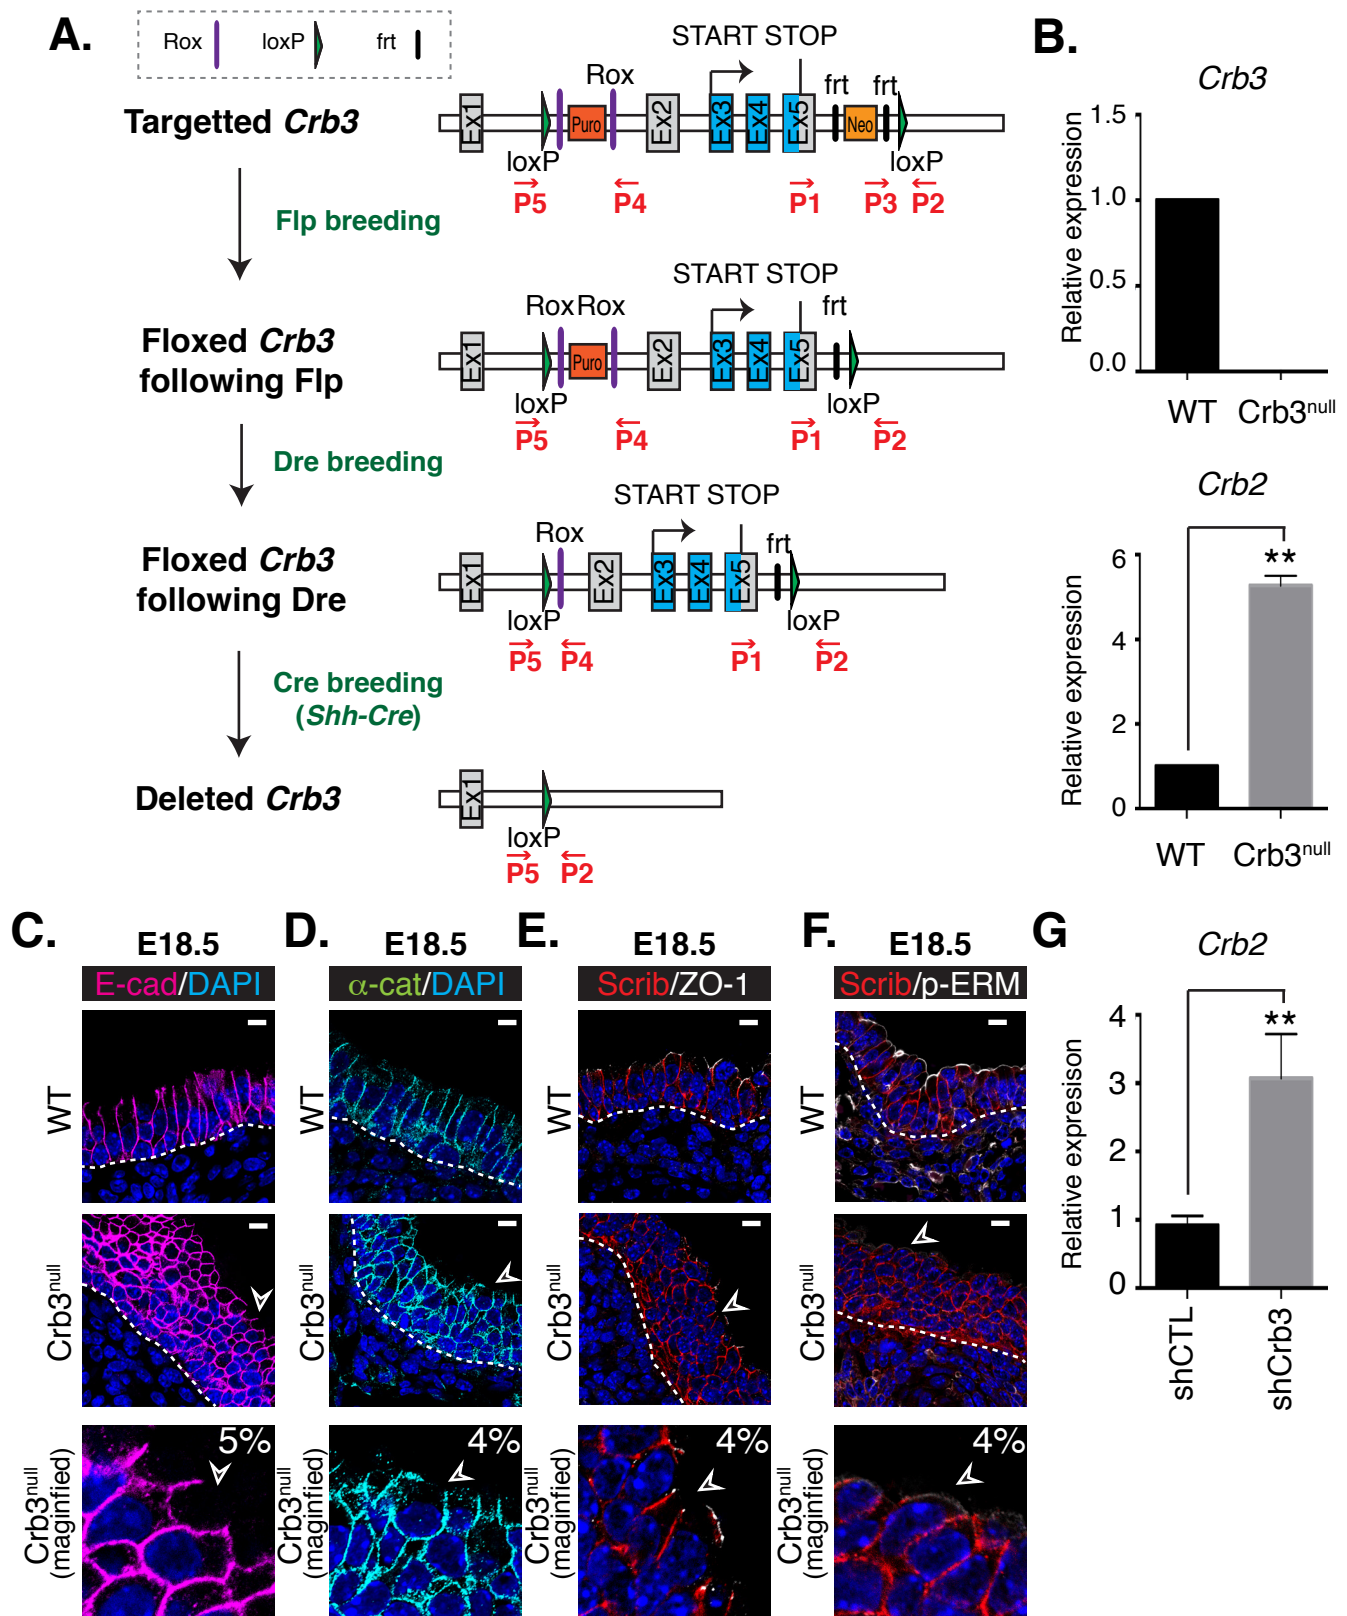

**Figure S5, Related to Figure 5. Conditional knockout of *Crb3* in the mouse lung epithelium. (A)** Schematic of the targeting strategy used to delete the *Crb3* gene. Genotyping primer combinations are depicted as red arrows (see Supplementary Experimental Procedures for further details). **(B)** Wild type or *Crb3*<sup>null</sup> tissues from E15.5 mice were examined by quantitative real-time PCR for *Crb3* and *Crb2* expression levels (n=3, average +SEM, \*\*p<0.0001). **(C, D, E, F)** E18.5 wild type (WT) or *Crb3*-null proximal airways were analyzed by immunofluorescence microscopy for the localization of **(C)** E-cadherin, **(D)** α-catenin, **(E)** Scrib and ZO-1, and **(F)** Scrib and p-ERM. An arrow marks cells that appeared to have an apical domain, and the quantitated percentage of these cells is shown on the top right of the panels (n=400 cells over three experiments). The basal surface of the epithelium is outlined with a thick white dotted line, and DAPI (blue) was used to mark nuclei. Scale bar = 10μm. **(G)** *Crb2* levels were determined by qPCR in *Crb3* knockdown ALI cultures. (n=3, average +SEM, \*\*p<0.0001)

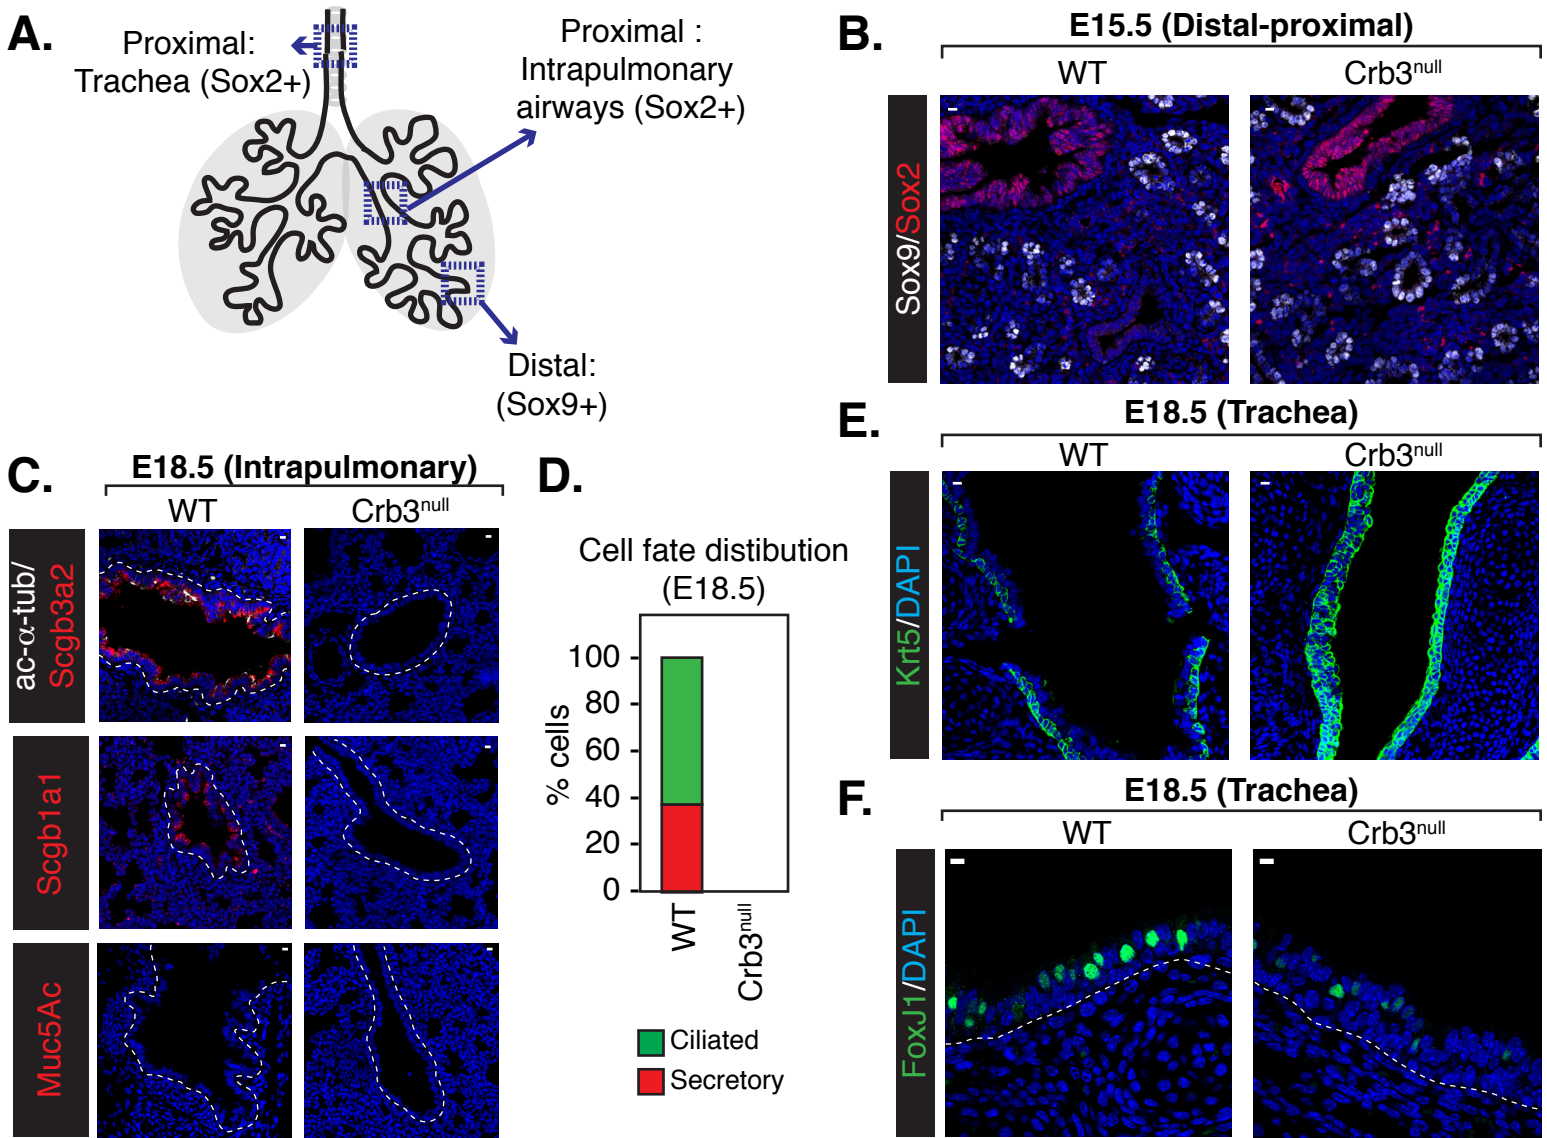

**Figure S6. Related to Figure 6. Knockout of Crb3 results in airway epithelium cell fate defects.** (A) Illustration depicting the different regions examined for cell fate defects in the Crb3-null lung epithelium. (B) E15.5 wild type (WT) or Crb3-null lungs were analyzed by immunofluorescence microscopy for Sox9 and Sox2 expression. (C) The intrapulmonary regions of E18.5 WT or Crb3-null proximal airways were analyzed by immunofluorescence microscopy for the presence of cells expressing Scgb1a1, Scgb3a2, Muc5A, or apical acetylated  $\alpha$ -tubulin, and (D) based on these markers the fate of the epithelial cells was quantitated (n=800 cells from 3 experiments) (E, F) The tracheas of E18.5 wild type (WT) or Crb3-null proximal airways were analyzed by immunofluorescence microscopy for the presence of (E) cells expressing the progenitor marker Krt5, and (F) the multi-ciliated cell marker FoxJ1. DAPI (blue) was used to mark nuclei in all images, and the basal epithelial surface in (C and F) is outlined with a white dotted line. Scale bar = 10 $\mu$ m.

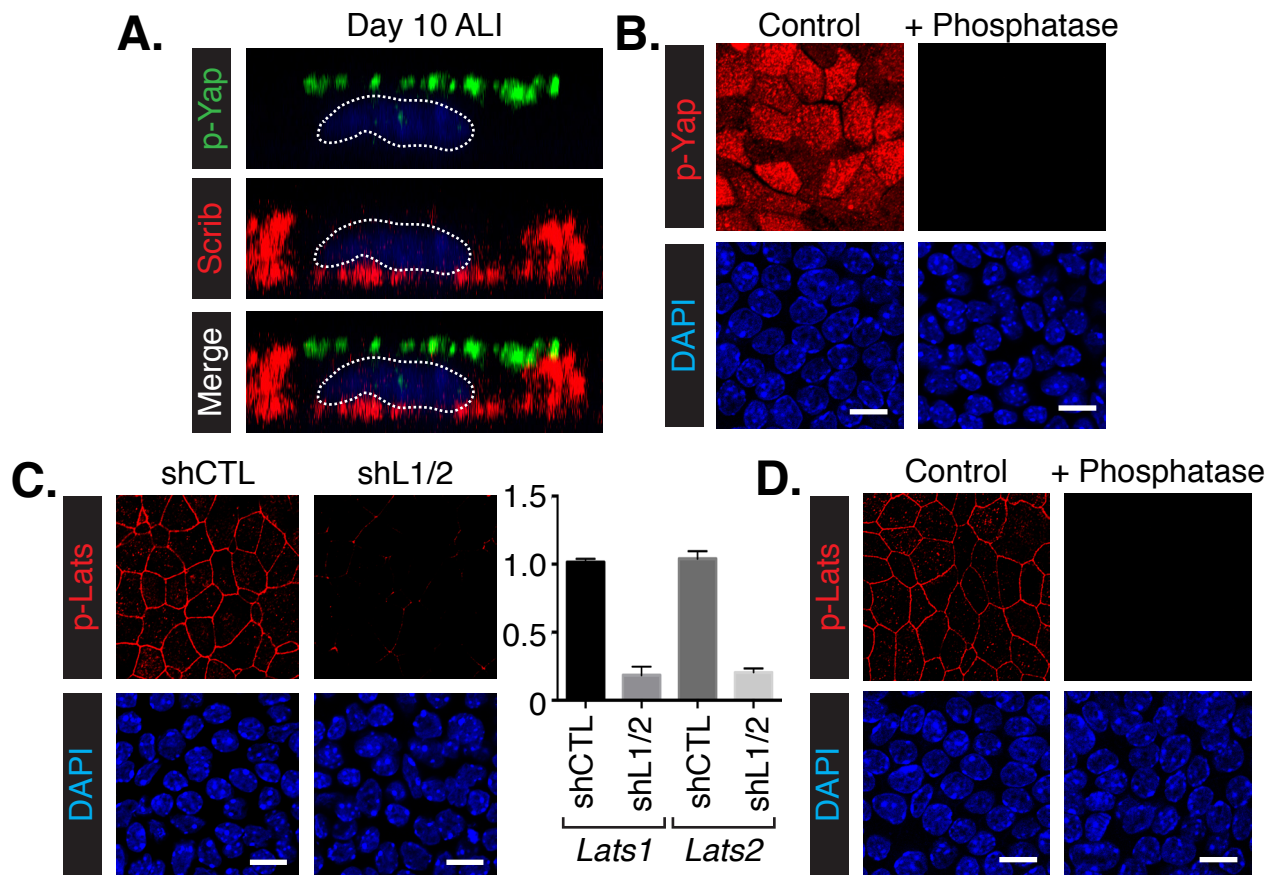

**Figure S7, Related to Figure 7. p-YAP and p-Lats1/2 antibody specificity.** (A) p-Yap and Scrib localization was assessed by confocal immunofluorescence microscopy in a single differentiated airway epithelial cell (10 days of ALI culture). The Z-plane view is shown to highlight the apical accumulation of p-Yap and the basal-lateral localization of Scrib. DAPI marked nuclei are outlined with a white dotted line. (B) Differentiated airway epithelial cells (10 days of ALI culture) were treated with or without Antarctic phosphatase for 2 h and p-Yap levels were determined by confocal immunofluorescence microscopy. (C) Lentiviruses were used to transduce control shRNA (shCTL) or shRNA targeting Lats1 and Lats2 (shL1/2) in airway progenitor cells isolated from mouse tracheas, and following 6 days of differentiation, the levels and localization of p-Lats1/2 was determined (the X-Y view is shown), and the level of Lats1 and Lats2 knockdown was determined in parallel cultures by qPCR (n=3, average+SEM). (D) Differentiated airway epithelial cells (10 days of ALI culture) were treated with or without Antarctic phosphatase for 2 h, and p-Lats1/2 levels were assessed using immunofluorescence microscopy. The X-Y view is shown. DAPI was used to mark nuclei. Scale bar = 10 $\mu$ m in all images.



## SUPPLEMENTAL EXPERIMENTAL PROCEDURES

### Genotyping details for the *Crb3*-null mice

#### *Primers*

| Primer Name    | Nucleotide sequence (5'– 3') |
|----------------|------------------------------|
| 1. Crb3-wtflpF | GAAGGGAAGAAAGTTCTTCAAAGACC   |
| 2. Crb3-R      | CCTCATCCACCACTCCAAGTGACC     |
| 3. Crb3-vF     | GCTGGGGCTCGACTAGAGCTTG       |
| 4. Crb3-dreR   | GGAAGTGTCTGTGAGGAAGCATGG     |
| 5. Crb3-F      | CAAGCTGTGCCCATACATCTGTGG     |

#### *Genotyping PCRs*

| Primer Combinations | PCR product size (bp) | Genotype                                                                |
|---------------------|-----------------------|-------------------------------------------------------------------------|
| 1 & 2               | 236                   | Wild Type                                                               |
| 2 & 3               | 340                   | Targeted Floxed <i>Crb3</i> mutant                                      |
| 1 & 2               | 601                   | Floxed <i>Crb3</i> mutant following Flp                                 |
| 4 & 5               | 228                   | Floxed <i>Crb3</i> mutant following Dre                                 |
| 2 & 5               | 351                   | Floxed <i>Crb3</i> mutant following Cre ( <i>Crb3</i> <sup>null</sup> ) |

## Antibodies used in the study

| Antigen                              | Species | Company                              | Cat #                                          | Dilution | Lot #         | Use     |
|--------------------------------------|---------|--------------------------------------|------------------------------------------------|----------|---------------|---------|
| Acetylated alpha-tubulin             | Mouse   | Sigma                                | T7415                                          | 1/1000   |               | IF      |
| Crb3                                 | Rabbit  | Custom                               | Targeted sequence:<br>VGARAPPPNLIK<br>LPPEERLI | 1/5000   | N/A           | IF      |
| CTNNA1 ( $\alpha$ -catenin)          | Mouse   | BD Bioscience                        | 610194                                         | 1/100    | 20174         | IF      |
| Phospho-Ezrin/Radixin Moesin (41A3)  | Rabbit  | Cell Signaling Technologies          | 3149S                                          | 1/100    | 8             | IF      |
| FoxJ1                                | Mouse   | eBioscience                          | 14-9965-80                                     | 1/300    | E10108-1630   | IF      |
| GAPDH                                | Rabbit  | Sigma                                | G8795                                          | 1/5000   |               | IB      |
| Ki67                                 | Mouse   | BD Bioscience                        | 550609                                         | 1/100    | 38            | IF      |
| Krt5                                 | Rabbit  | Covance                              | PRB-160P-100                                   | 1/300    | D12KF03035    | IF      |
| Krt8                                 | Rat     | Developmental Studies Hybridoma Bank | TROMA-1c                                       | 1/500    | 42004         | IF      |
| p63                                  | Mouse   | Santa Cruz                           | 8431                                           | 1/50     | I1112 & D0412 | IF      |
| Phospho-LATS1 T1079                  | Rabbit  | Cell Signaling Technologies          | 9159S                                          | 1/100    | 1             | IB      |
| Phospho-LATS1/2 (T1079/T1041)        | Rabbit  | Assay BioTech                        | A8125                                          | 1/100    | 118125        | IF, PLA |
| Scgb1a1                              | Goat    | Santa Cruz                           | 9772                                           | 1/300    | C2913         | IF      |
| Scgb3a2                              | Rabbit  | Custom antibody                      | N/A                                            | 1/5000   | N/A           | IF      |
| Scrib                                | Goat    | Santa Cruz                           | 11049                                          | 1/100    | L0513         | IF      |
| Sox2                                 | Rabbit  | Seven Hills                          | WRAB-1236                                      | 1/500    | 1013A         | IF      |
| Sox9                                 | Goat    | R&D Systems                          | AF3075                                         | 1/100    | WIL0413111    | IF      |
| Yap                                  | Mouse   | Santa Cruz                           | 101199                                         | 1/100    | B2713 & A0512 | IF, PLA |
| Yap-p-S127 (recognizes mouse p-S112) | Rabbit  | Cell Signaling Technologies          | 13008S                                         | 1/100    | 1 & 2         | IF      |
| Zo-1                                 | Rabbit  | Zymed                                | 61-7300                                        | 1/100    |               | IF      |

## Primers used for SYBR Green RT-qPCR

| Target       | Direction | Sequence                |
|--------------|-----------|-------------------------|
| <i>Gapdh</i> | Forward   | TGTTCCCTACCCCCAATGTGT   |
| <i>Gapdh</i> | Reverse   | GGTCCTCAGTGTAGCCCAAG    |
| <i>Yap</i>   | Forward   | AATGTGGACCTTGGCACACT    |
| <i>Yap</i>   | Reverse   | ACTCCACGTCCAAGATTTTCG   |
| <i>Crb2</i>  | Forward   | GATCCTAACAGCTTCCGTTGC   |
| <i>Crb2</i>  | Reverse   | GCACTCGTAGTGATCTGCCA    |
| <i>Crb3</i>  | Forward   | CCGGACCCTTTCACAAATAG    |
| <i>Crb3</i>  | Reverse   | TCGCATGAGCAGAAACAGTC    |
| <i>Lats1</i> | Forward   | GCGATGTCTAGCCCATTCTC    |
| <i>Lats1</i> | Reverse   | GGTTGTCCCACCAACATTTTC   |
| <i>Lats2</i> | Forward   | ACAGAGACGCAGCTGAAGGT    |
| <i>Lats2</i> | Reverse   | CACAGCTTCGTGATGAGGTC    |
| <i>Ctgf</i>  | Forward   | GGGCCTCTTCTGCGATTTTC    |
| <i>Ctgf</i>  | Reverse   | ATCCAGGCAAGTGCATTGGTA   |
| <i>Cyr61</i> | Forward   | TAAGGTCTGCGCTAAACAACCTC |
| <i>Cyr61</i> | Reverse   | CAGATCCCTTTCAGAGCGGT    |
| <i>Fgfr</i>  | Forward   | CCTCGATGTGCGTTGAACGGTC  |
| <i>Fgfr</i>  | Reverse   | CAGCATCCATCTCCGTCACA    |
| <i>Itga6</i> | Forward   | GCTGTTCTTGCCGGGATTCT    |
| <i>Itga6</i> | Reverse   | AGTATGGATCTCAGCCTTGT    |
| <i>Itgβ4</i> | Forward   | ACGATTGCCCTTTAAAGTC     |
| <i>Itgβ4</i> | Reverse   | GCAACAGGAGGAAGATGAGC    |
